# Supplementary material for: SnRK1 activates autophagy via the TOR signaling pathway in Arabidopsis thaliana
Source: PubMed Central journal article supplement (PMC5544219; doi:10.1371/journal.pone.0182591), 2017-08-04
Supplement: pone.0182591.s003.pdf [file pone.0182591.s003.pdf]

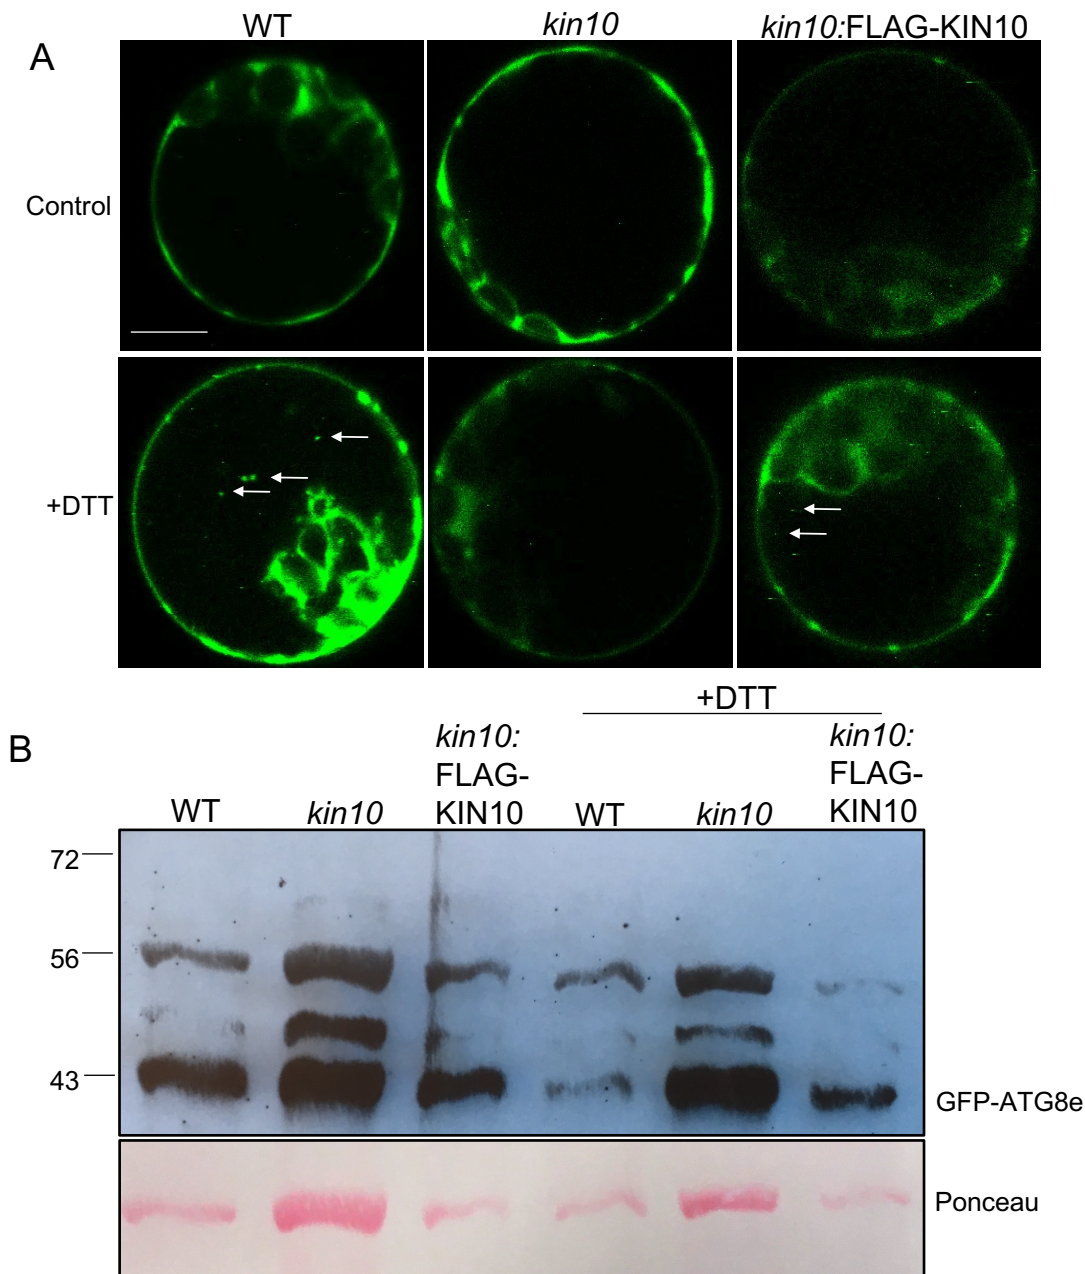

**S3 Fig. Complementation of the *kin10* mutant**

(A) The autophagosome marker GFP-ATG8e was transiently expressed in leaf protoplasts from the indicated genotypes and visualized by confocal microscopy. After inducing ER stress as a representative stress with 2 mM DTT, *kin10:FLAG-KIN10* shows induction of autophagy as in WT, while *kin10* mutant fails to induce autophagy. White arrows point to autophagosomes. Scale bar = 10  $\mu$ m. (B) Immunoblotting of protein extracts from protoplasts as in (A) using antibodies against GFP. Ponceau S stain was used as loading control. All samples show approximately equal expression of GFP-ATG8e.
